# Supplementary material for: Commentary on human pluripotent stem cell-based blood–brain barrier models
Source: Springer Nature journal article supplement (doi:10.1186/s12987-020-00222-3), 2020-10-19

## **Additional Methods**

### *hPSC maintenance and differentiation*

H9 and H9-CDH5-eGFP hESCs [26] were maintained on Matrigel (Corning) in TeSR-E8 medium (Stemcell Technologies). UM-BMECs were differentiated as previously described [5] with the modification that 1× B-27 Supplement (Life Technologies) was substituted for platelet-poor plasma-derived serum (PDS) in the endothelial medium used from day 6 to day 8 of differentiation. D-BMECs were differentiated as previously described [6]. Both UM-BMECs and D-BMECs were evaluated at D8. H9-CDH5-eGFP hESCs used in A-BMEC experiments were maintained on Matrigel (Corning) in E8 medium prepared as previously described [17]. A-BMECs were differentiated as previously described [18] in MatTek 35 mm glass bottom dishes and evaluated at D6. Generic ECs were differentiated as previously described [33] with the modification that endothelial progenitors were sorted at D5 using CD31 magnetic microbeads (Miltenyi Biotec) and subsequently cultured in Human Endothelial Serum Free Medium (Life Technologies) supplemented with 1× B-27 Supplement and 10 ng/mL FGF2 (Waisman Biomanufacturing), and generic ECs were analyzed on D8.

### *Immunocytochemistry*

Cells were fixed for 10 min with cold 100% methanol and washed 3× in Dulbecco's PBS without calcium or magnesium (DPBS). Cells were blocked with DPBS containing 10% goat serum for 1 h at room temperature with gentle shaking. Cells were incubated with mouse anti-VE-cadherin (BV9, Santa Cruz Biotechnology) antibody diluted 1:25 in DPBS containing 10% goat serum overnight at 4°C with gentle shaking. Cells were washed 3× with DPBS and incubated with goat anti-mouse IgG-AlexaFluor 647 (Life Technologies) diluted 1:200 in DPBS containing 10% goat

serum for 1 h at room temperature with gentle shaking. Cells were washed 3× with DPBS and imaged with a Nikon Eclipse Ti2-E microscope.

#### *Visualization of eGFP expression by fluorescence microscopy*

Undifferentiated H9-CDH5-eGFP hESCs and D6 A-BMECs were rinsed 2× with DPBS and fixed for 20 min in 4% paraformaldehyde. Cells were washed 3× in DPBS, 5 min per wash, and eGFP fluorescence was imaged with a Leica DMI8 microscope. Cells were not incubated with any primary or secondary antibodies prior to imaging.

#### *Flow cytometry*

Cells were dissociated with Accutase (Innovative Cell Technologies) at 37°C, passed through 40 µm filters into 4× volume of DMEM/F-12 (Life Technologies), and centrifuged at 200×g for 5 min. Cell pellets were resuspended in cold DPBS containing 0.5% BSA, 2 mM EDTA, and 2 µg/mL DAPI and immediately analyzed on an Attune NxT flow cytometer (ThermoFisher). Debris were removed using side scatter (SSC)-forward scatter (FSC) gating, single cells selected using FSC-H versus FSC-A and SSC-H versus SSC-A, and live cells selected using a DAPI-negative gate. Example flow cytometry plots depicting this gating strategy are shown in Supplementary Figure S1.

#### *Western blotting*

Cells were lysed with cold RIPA lysis buffer (Rockland) supplemented with Halt protease inhibitor cocktail (Thermo Scientific). A BCA assay was used to determine protein concentration, and equal amounts of protein were resolved on 4–12% tris-glycine gels. Proteins were transferred to nitrocellulose membranes and blocked in tris-buffered saline containing 0.1% Tween-20 (TBST) and 5% nonfat dry milk for 1 h at room temperature. Membranes were incubated with primary antibodies diluted in TBST containing 5% milk overnight at 4°C: Membrane 1: mouse anti-VE-

cadherin (BV9, Santa Cruz Biotechnology) and rabbit anti- $\beta$ -actin (13E5, Cell Signaling Technology); Membrane 2: mouse anti-GFP (B-2, Santa Cruz Biotechnology). Membranes were washed 5 $\times$  with TBST and incubated with secondary antibodies diluted in TBST containing 5% milk for 1 h at room temperature: Membrane 1: goat anti-mouse IgG IRDye 800 (LI-COR) and goat anti-rabbit IgG IRDye 680 (LI-COR); Membrane 2: goat anti-mouse IgG IRDye 800 (LI-COR). Membranes were washed 5 $\times$  with TBST and imaged using a LI-COR Odyssey.

### *Statistics*

All experiments were conducted in biological triplicate (e.g., three independently differentiated wells of a 6-well plate). Data shown are from representative differentiations of the H9 and H9-CDH5-eGFP hESC lines; all experiments were replicated in an additional differentiation of each line. Student's unpaired t-test was used for all statistical analyses.

Figure S1: Example flow cytometry gating strategy for data shown in Fig 1b.

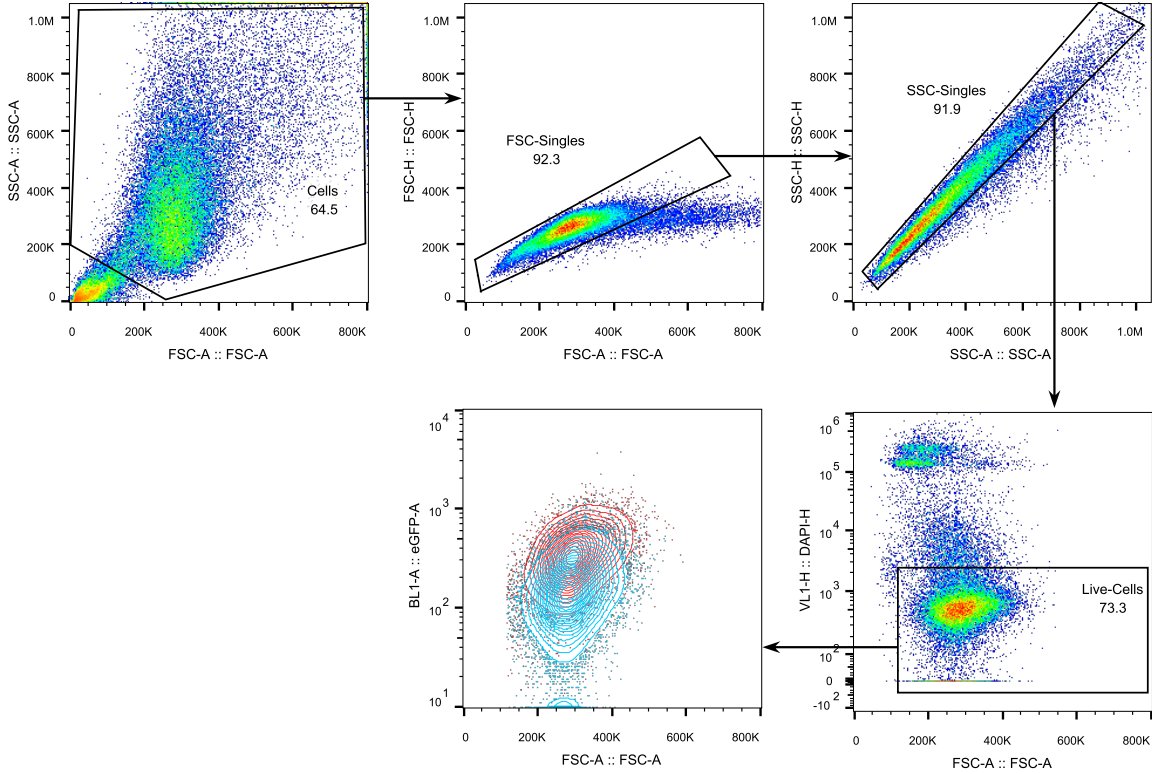

**Figure S2: Uncropped Western blot images.** Dashed lines indicate the bands displayed in Figure 1d.

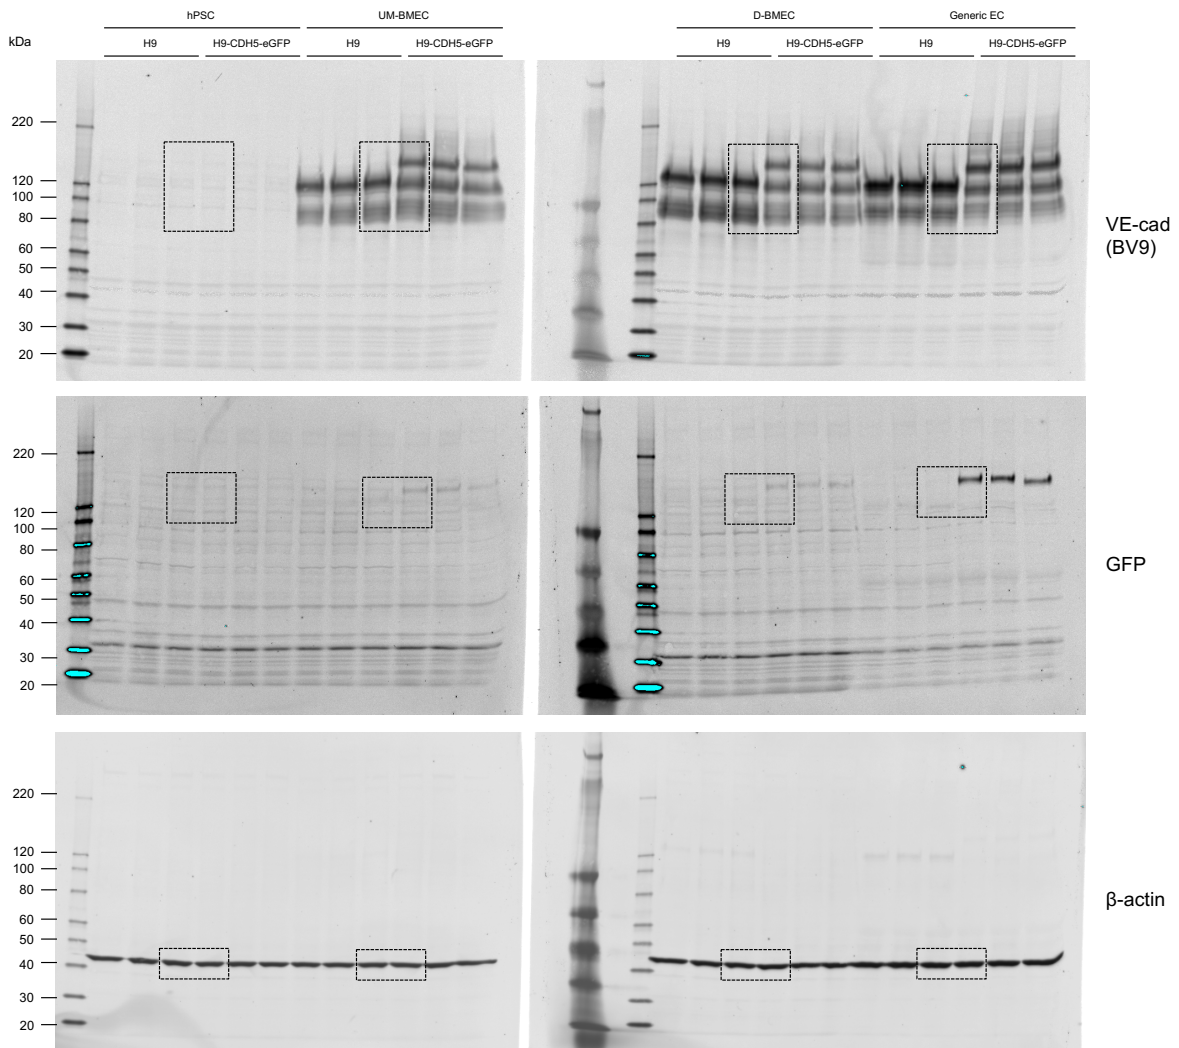

Supplement: MOESM1 [file 18499960]
